# Supplementary material for: Dynamic covalent bond and metal coordination bond-cross-linked silicone elastomers with excellent mechanical and aggregation-induced emission properties
Source: Royal Society of Chemistry journal article supplement (doi:10.1039/d3py00140g), 2023-01-01
Supplement: d3py00140g1.pdf [file d3py00140g1.pdf]

Supporting Information

**Dynamic covalent bonds and metal coordination bonds crosslinked  
silicone elastomers with excellent mechanical and aggregation-  
induced emission properties**

Ning Wang,<sup>a</sup> Hui-Wei Feng,<sup>b</sup> Xinhui Hao,<sup>a</sup> Yang Cao,<sup>a</sup> Xing-Dong Xu<sup>\*a</sup> and Shengyu Feng<sup>\*a</sup>

<sup>a</sup> Key Laboratory of Special Functional Aggregated Materials of Ministry of Education, Shandong Key Laboratory of Advanced Silicone Materials and Technology, School of Chemistry and Chemical Engineering, National Engineering Research Center for Colloidal Materials, Shandong University, Jinan 250100, Shandong Province, China.

E-mail: [xuxd@sdu.edu.cn](mailto:xuxd@sdu.edu.cn), [fsy@sdu.edu.cn](mailto:fsy@sdu.edu.cn)

<sup>b</sup> The Second Hospital of Shandong University, Jinan 250033, China

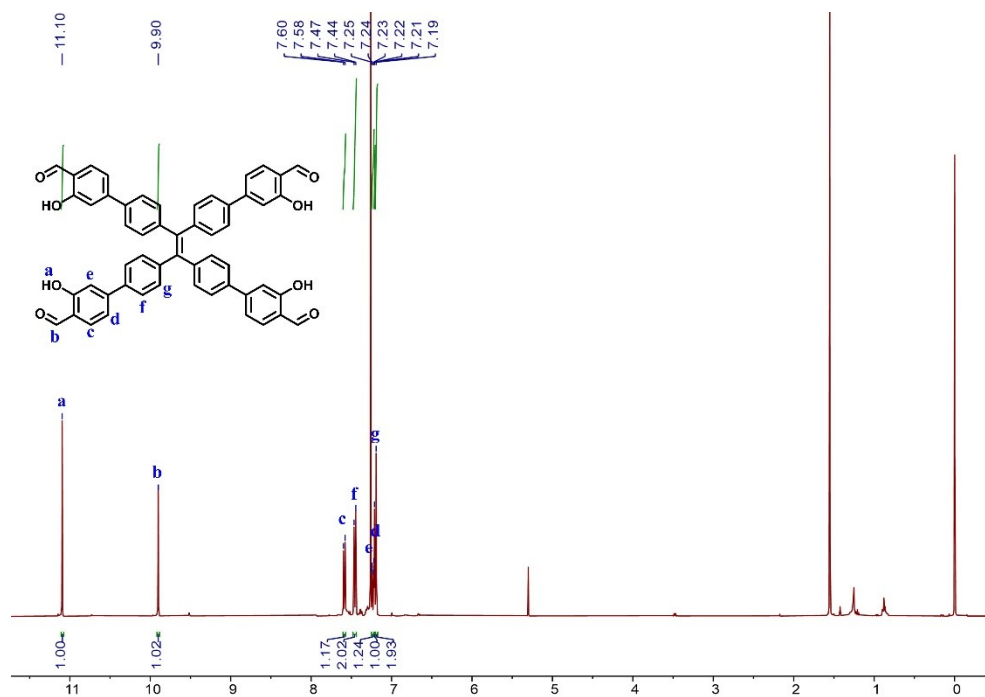

Figure S1. <sup>1</sup>H NMR spectrum (400 MHz, CDCl<sub>3</sub>, 298 K) of TPE-1.

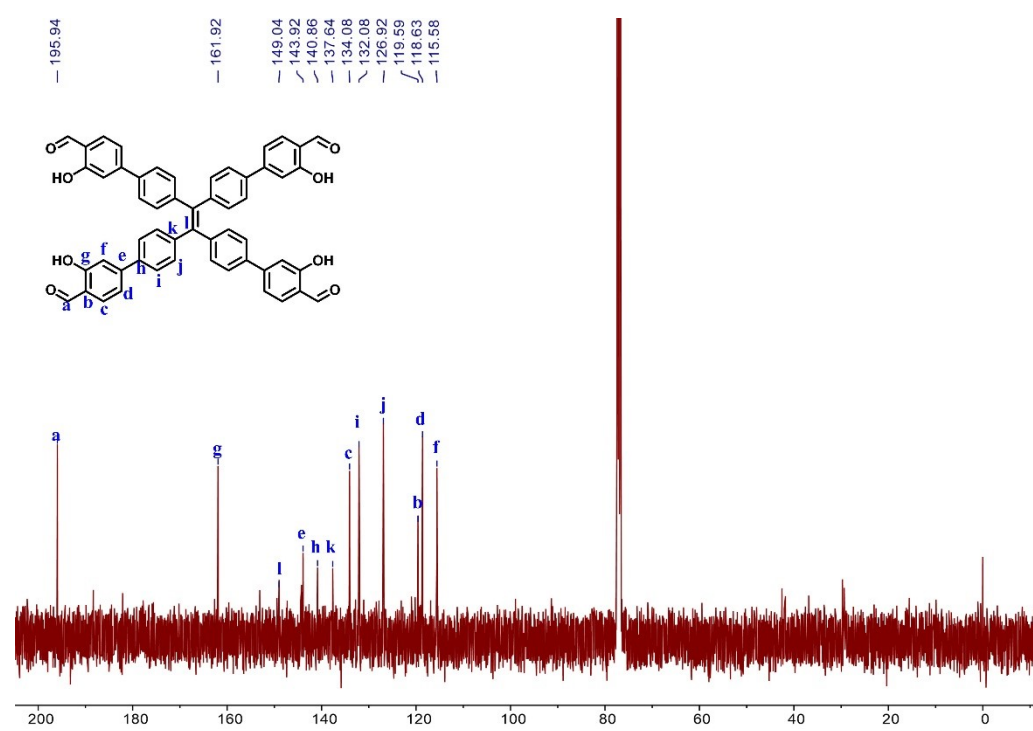

Figure S2. <sup>13</sup>C NMR spectrum (100 MHz, CDCl<sub>3</sub>, 298 K) of TPE-1.

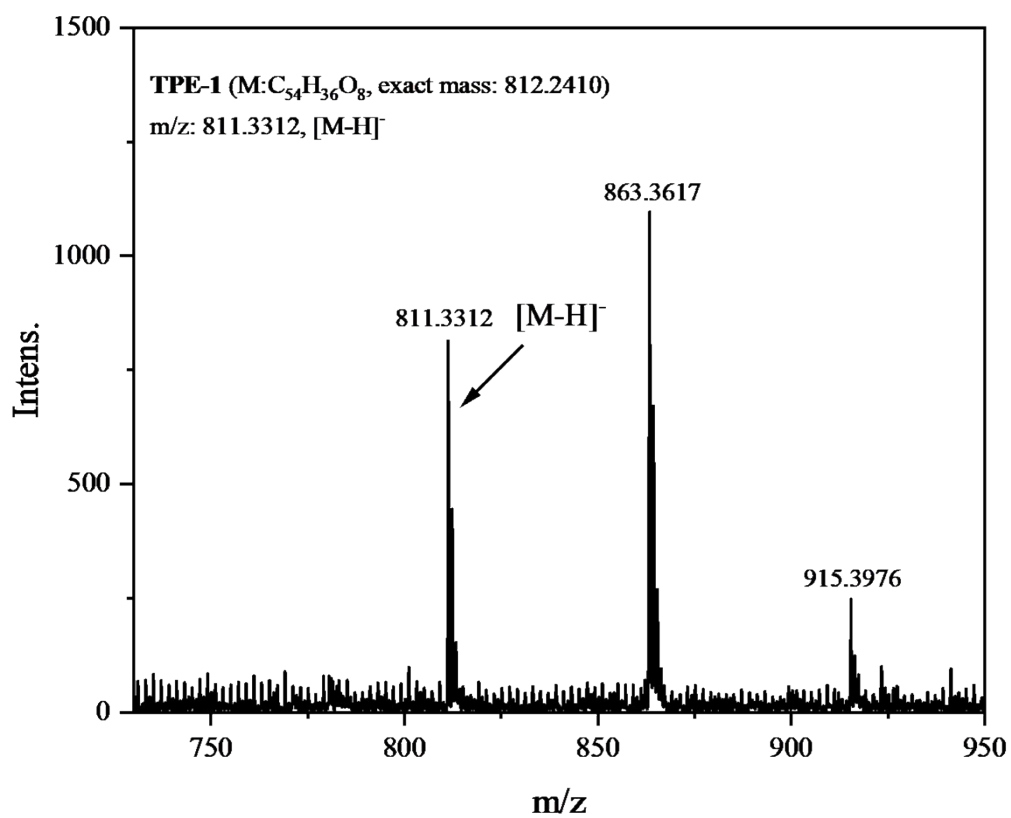

Figure S3. ESI-MS spectra of TPE-1.

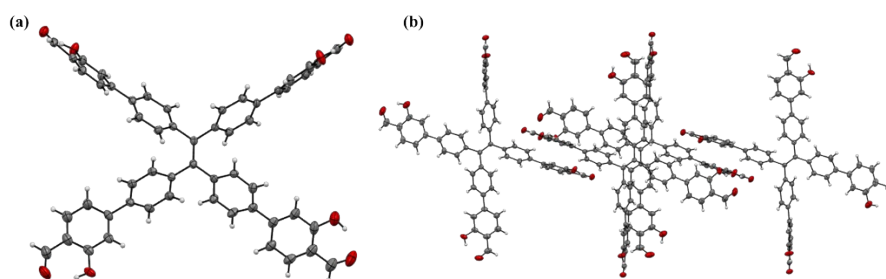

Figure S4. X-ray crystal structure (a) and the packing diagrams (b) of TPE-1.

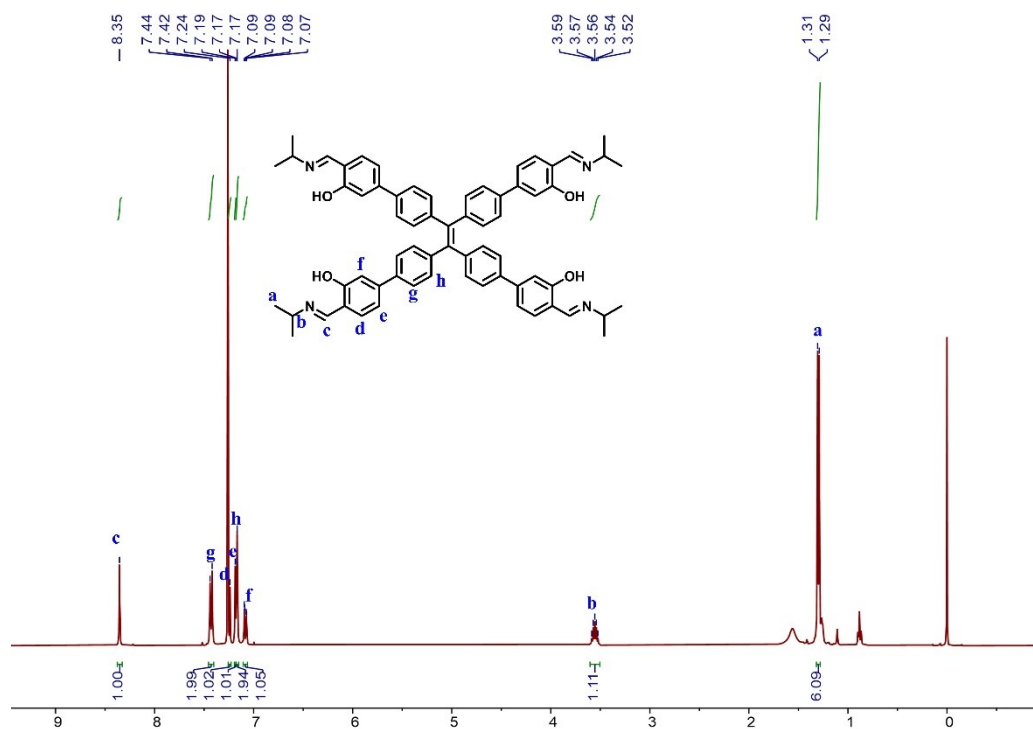

Figure S5. <sup>1</sup>H NMR spectrum (400 MHz, CDCl<sub>3</sub>, 298 K) of TPE-2.

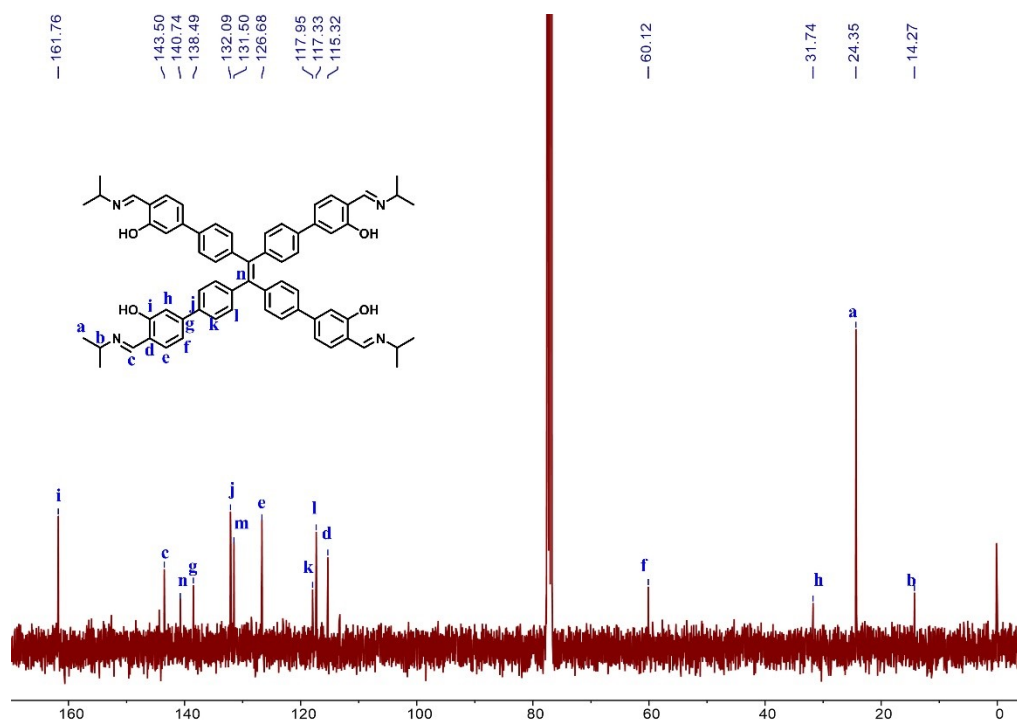

Figure S6. <sup>13</sup>C NMR spectrum (100 MHz, CDCl<sub>3</sub>, 298 K) of TPE-2.

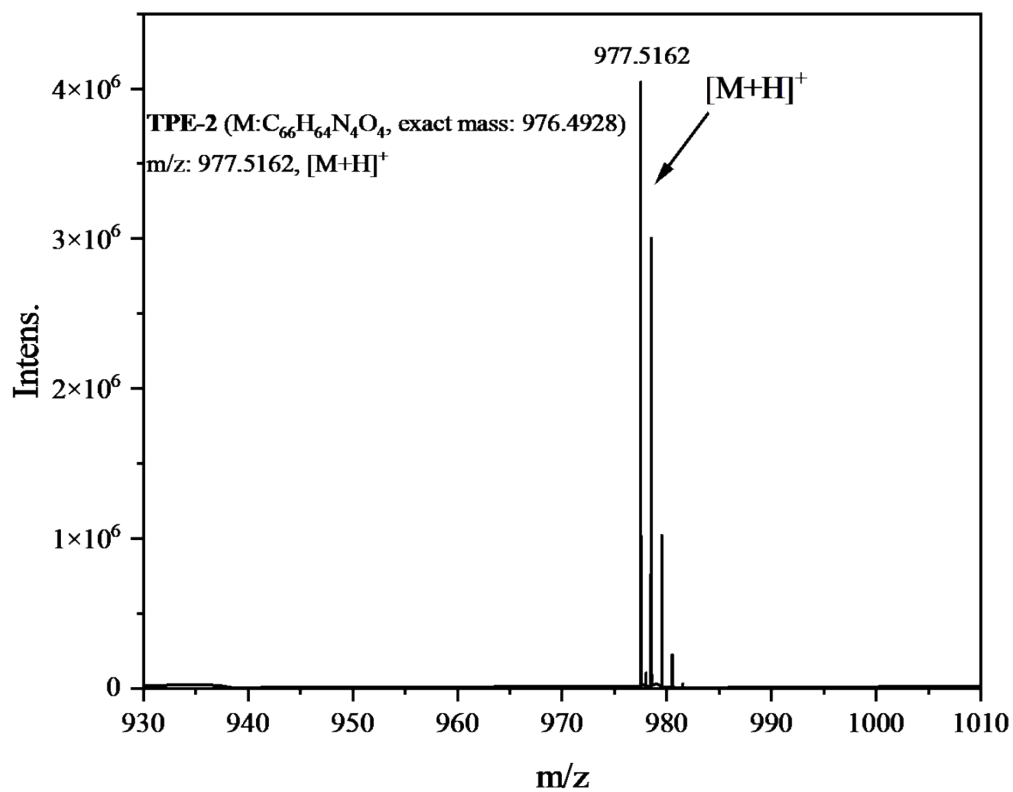

Figure S7. ESI-MS spectra of TPE-2.

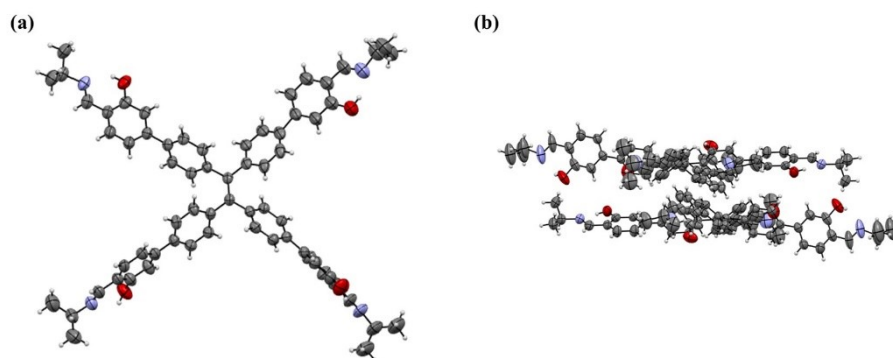

Figure S8. X-ray crystal structure (a) and the packing diagrams (b) of TPE-2.

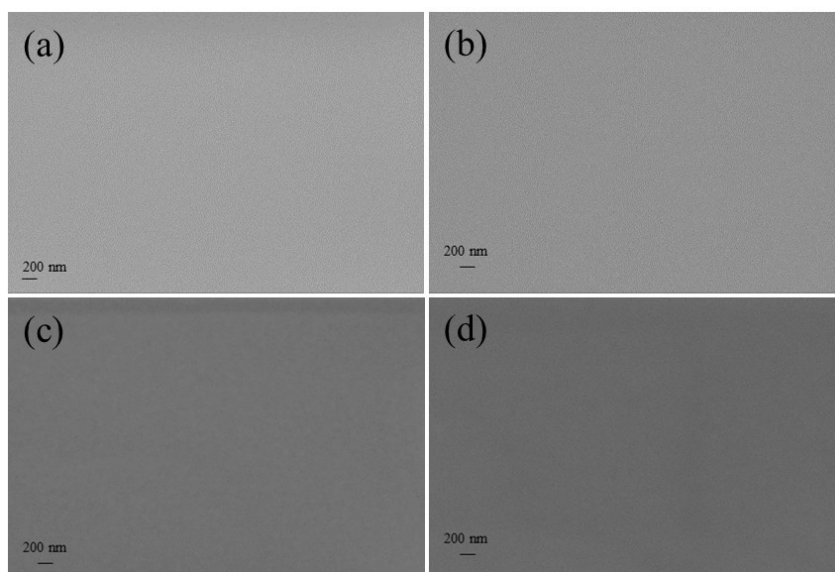

**Figure S9.** Selected SEM image of elastomer (a) **P-0**, (b) **P-Zn**, (c) **P-Cu**, (d) **P-Fe**.

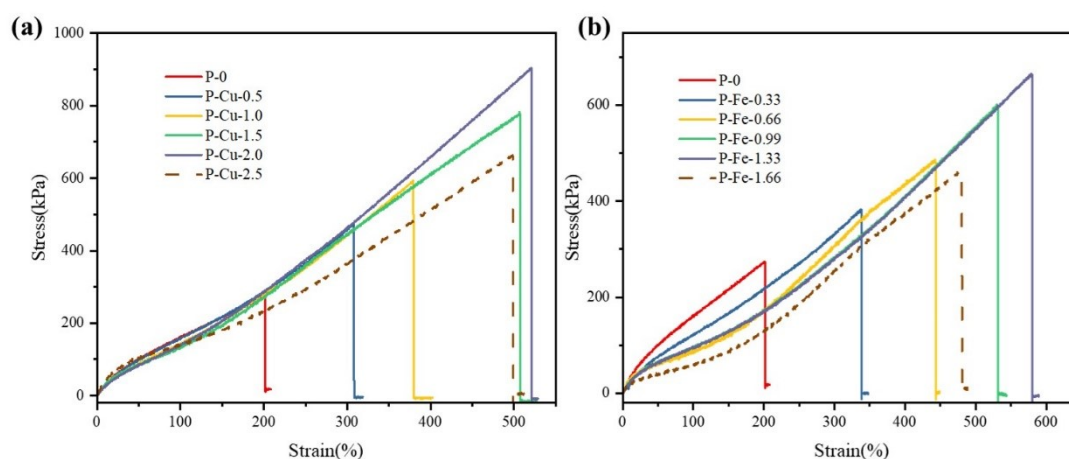

**Figure S10.** (a) Stress-strain curves of elastomers **P-Cu-x** with varying  $\text{Cu}^{2+}/\text{TPE-1}$  molar ratios; (b) Stress-strain curves of elastomers **P-Fe-x** with varying  $\text{Fe}^{3+}/\text{TPE-1}$  molar ratios.

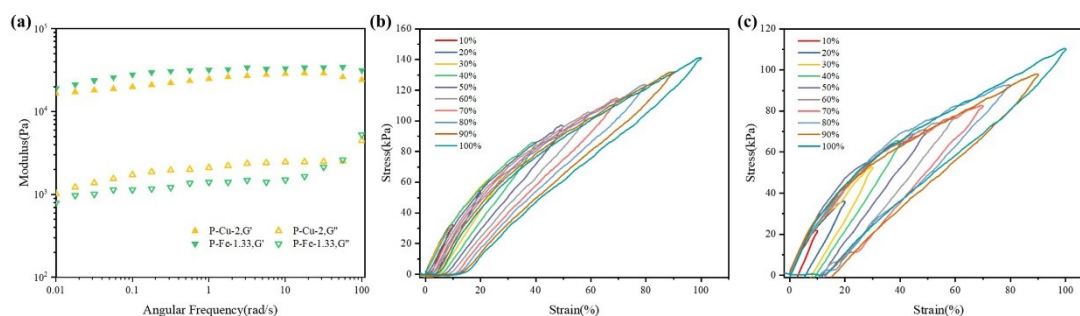

**Figure S11.** (a)  $G'$  and  $G''$  of **P-Cu-2** and **P-Fe-1.33** at various frequencies.; (b) Consecutive cycling stress-strain curves for **P-Cu-2** from 10 to 100% without intervals; (c) Consecutive cycling stress-strain curves for **P-Fe-1.33** from 10 to 100% without intervals.

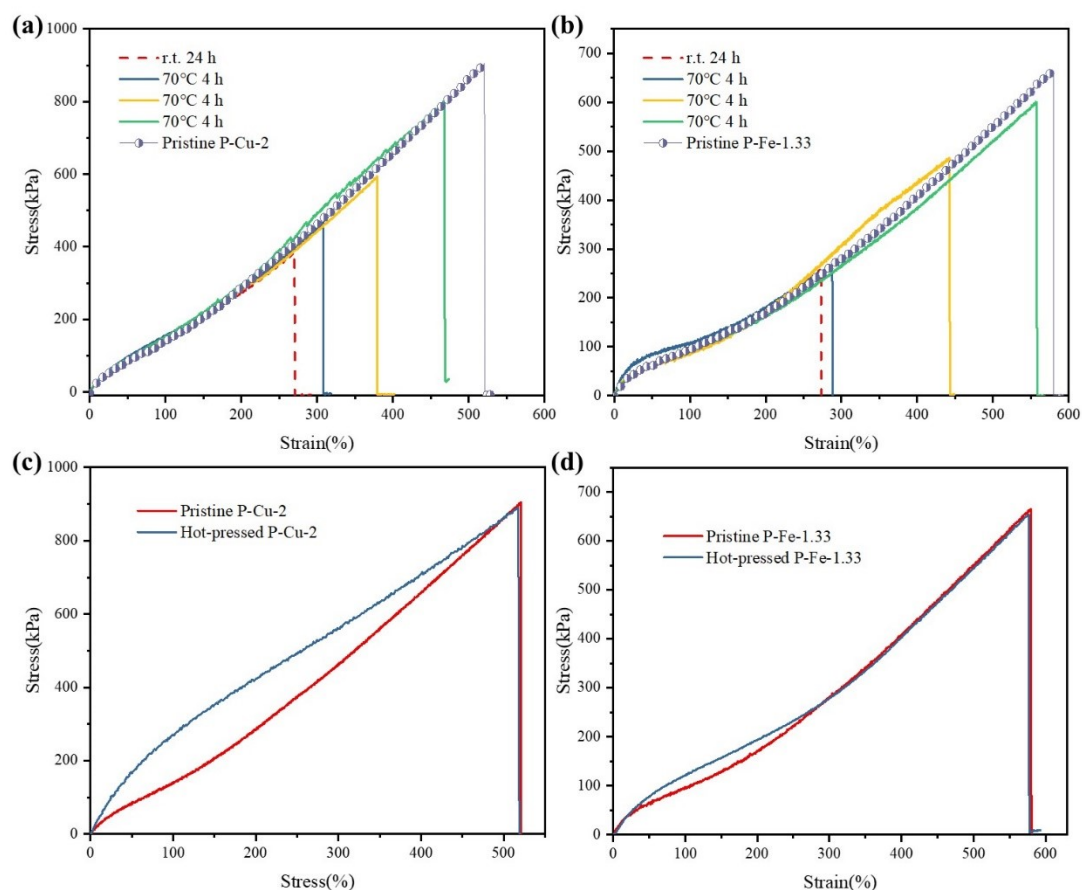

**Figure S12.** Tensile curves of **P-Cu-2** (a) and **P-Fe-1.33** (b) healed at room temperature and 70 °C for different times; Tensile stress tests of pristine and hot-pressed elastomers (c) **P-Cu-2** and (d) **P-Fe-1.33**.

**Table S1.** Crystallographic data<sup>a</sup> for compounds **TPE-1** and **TPE-2**.

|                            | <b>TPE-1</b>                                   | <b>TPE-2</b>                                                  |
|----------------------------|------------------------------------------------|---------------------------------------------------------------|
| <b>formula</b>             | C <sub>54</sub> H <sub>36</sub> O <sub>8</sub> | C <sub>66</sub> H <sub>64</sub> N <sub>4</sub> O <sub>4</sub> |
| <b>FW</b>                  | 812.83                                         | 977.21                                                        |
| <b>T, K</b>                | 173                                            | 173                                                           |
| <b>cryst. syst., space</b> | Monoclinic                                     | Triclinic                                                     |
| <b>group</b>               | P1 21/n1                                       | P -1                                                          |
| <b>Z</b>                   | 4                                              | 2                                                             |
| <b>a, Å</b>                | 9.6319(7)                                      | 9.3439(11)                                                    |
| <b>b, Å</b>                | 26.669(2)                                      | 17.753(2)                                                     |
| <b>c, Å</b>                | 18.8824(15)                                    | 18.6225(18)                                                   |

---

|                                                                                       |                 |                |
|---------------------------------------------------------------------------------------|-----------------|----------------|
| $\alpha, ^\circ$                                                                      | 90              | 83.662(5)      |
| $\beta, ^\circ$                                                                       | 94.412(3)       | 76.429(5)      |
| $\gamma, ^\circ$                                                                      | 90              | 87.119(5)      |
| $V, \text{\AA}^3$                                                                     | 4835.9(6)       | 2983.5(6)      |
| $d_{\text{calc}}, \text{g/cm}^3$                                                      | 1.116           | 1.088          |
| $\mu, \text{mm}^{-1}$                                                                 | 0.605           | 0.528          |
| <b>F (000)</b>                                                                        | 1696.0          | 1040.0         |
| <b>GOF on F<sup>2</sup></b>                                                           | 1.118           | 1.337          |
| <b>R1(<math>\omega</math>R<sub>2</sub>), %</b><br><b>[I&gt;2sigma(I)]<sup>b</sup></b> | 0.0974 (0.3085) | 0.1073(0.3772) |

---
